# Supplementary material
Source: publisher figshare collection journal article supplement (https://frontiersin.figshare.com/ndownloader/files/34920108)
Supplement: Supplementary file [file 34920108]

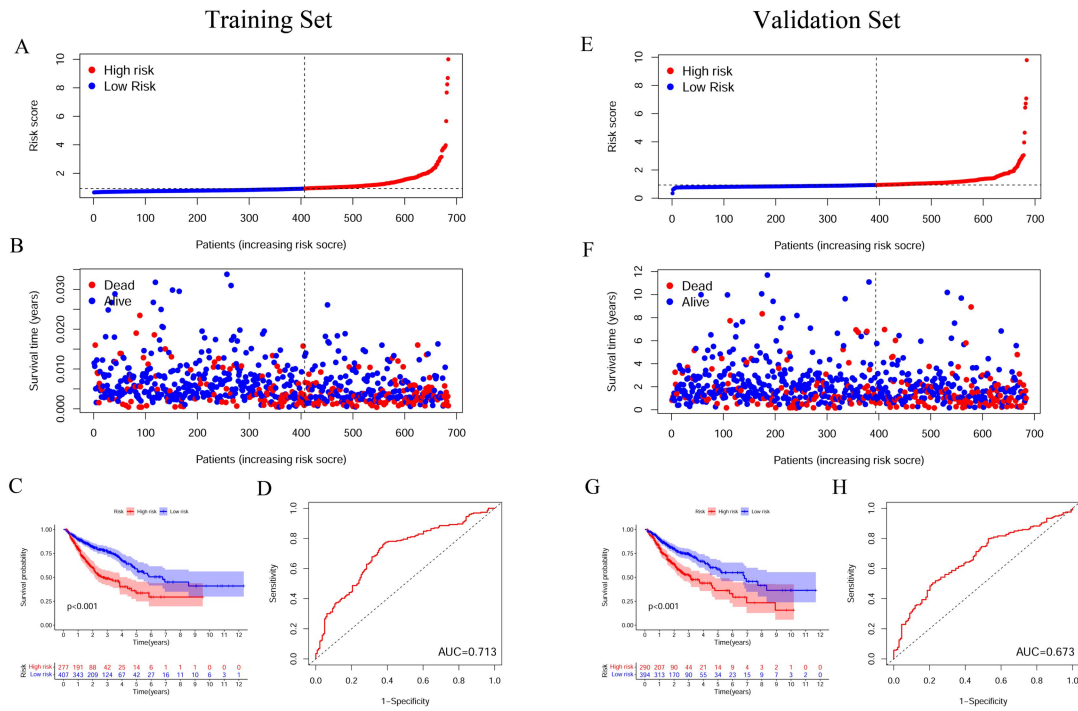

Supplement Figure 1. The assessment of prognostic model in training set (A-D) and validation set (E-H). (A, E) As the number of patients increased, the risk scores of the prognostic model were raised. (B, F) As the number of patients increased, the number of patient deaths significantly increased. (C, G) The survival time was significantly longer in the low-risk group than in the high-risk group. (D, H) ROC analysis based on three years survival outcomes showed that the prognostic models had certain predictive ability.
